# Supplementary material for: spRefine denoises and imputes spatial transcriptomics with a reference-free framework powered by genomic language model
Source: HighWire-hosted journal article supplement (doi:10.1101/gr.281001.125), 2026-02-03
Supplement: Supplemental_Table_S2.xlsx [file Supplemental_Table_S2.xlsx]

## Sheet: running statistics
cell number	batch size	GPU memory	Peak System Mem	running time
160254	32	1.46G	34G	3000s

## Sheet: hyper parameter setting
dataset	lr	batch size	early stopping patience	maximal epoch	embedding size
breast_xenium	0.0001	2048	10	1000	256
brain_xenium	0.0001	2048	10	1000	256
embryo_seqfish	0.0001	2048	10	1000	256
brain_osmfish	0.0001	2048	10	1000	256

## Sheet: README
Supplemental Table 2: Statistics of experiments in spRefine
